# Supplementary material for: Size exclusion propyne/propylene separation in an ultramicroporous yet hydrophobic metal–organic framework
Source: Royal Society of Chemistry journal article supplement (doi:10.1039/d2qi01152b), 2022-01-01
Supplement: d2qi01152b1.pdf [file d2qi01152b1.pdf]

## Supporting Information

### **Size exclusion propyne/propylene separation in a ultramicroporous yet hydrophobic metal-organic framework**

Ming-Ming Xu, Yu-Hui Liu, Xin Zhang, Hao-Tian Wang, Lin-Hua Xie\*, Jian-Rong Li\*

\* Corresponding authors.

E-mail addresses: xielinhua@bjut.edu.cn (L.-H. Xie), jrli@bjut.edu.cn (J.-R. Li)

*Beijing Key Laboratory for Green Catalysis and Separation and Department of Environmental Chemical Engineering, Beijing University of Technology, Beijing 100124, P. R. China*

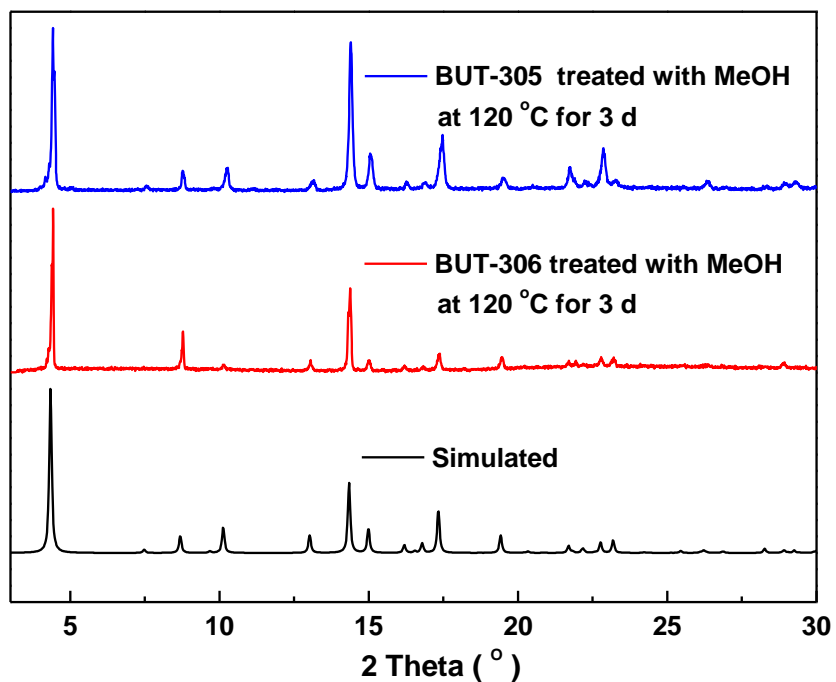

Fig. S1 The PXRD patterns of **BUT-305** and **-306** treated with MeOH at 120 °C for 3 days.

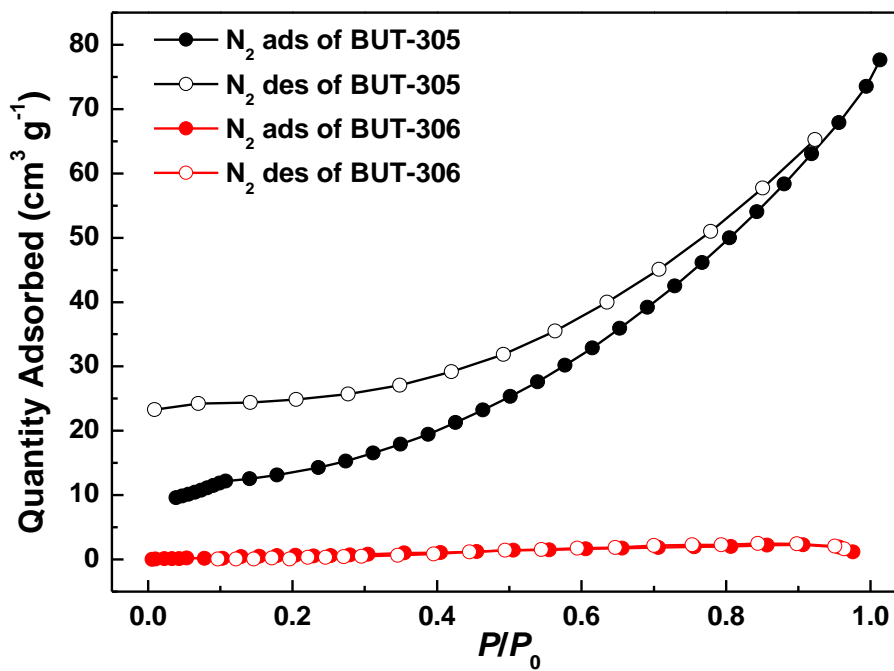

Fig. S2  $N_2$  adsorption isotherms of **BUT-305** and **-306** at 77 K.

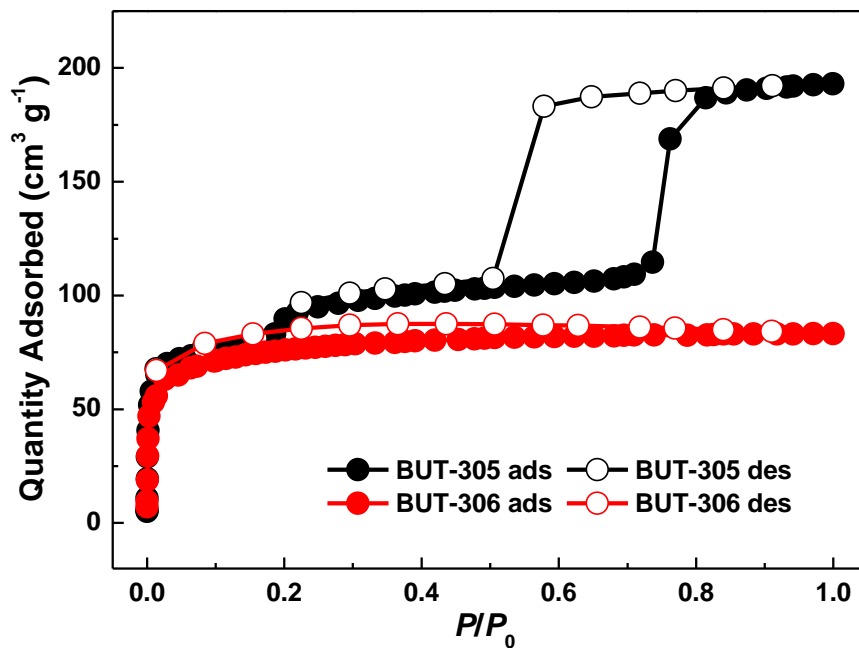

Fig. S3 The CO<sub>2</sub> adsorption isotherms of **BUT-305** and **-306** at 195 K.

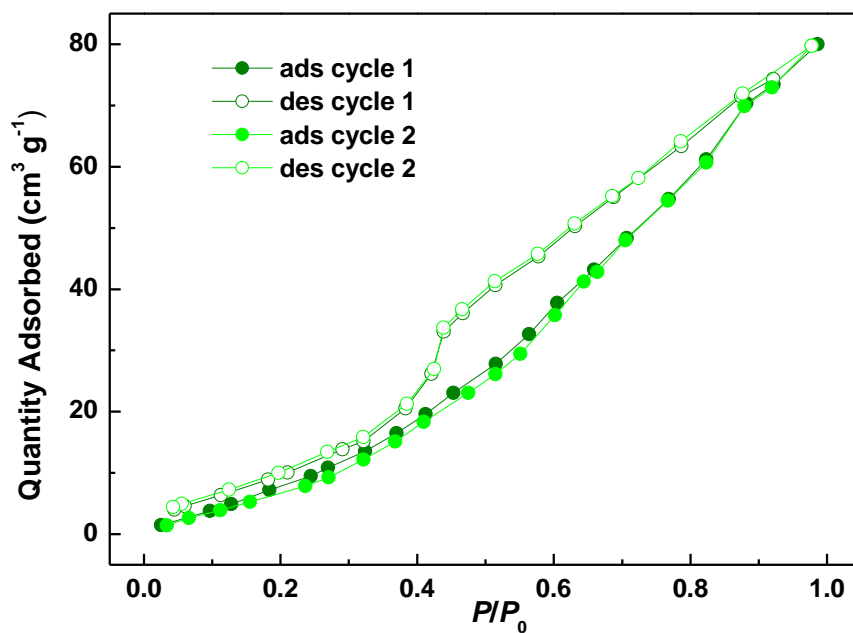

Fig. S4 Two repeated measurements of H<sub>2</sub>O adsorption isotherms of **BUT-306** at 298 K.

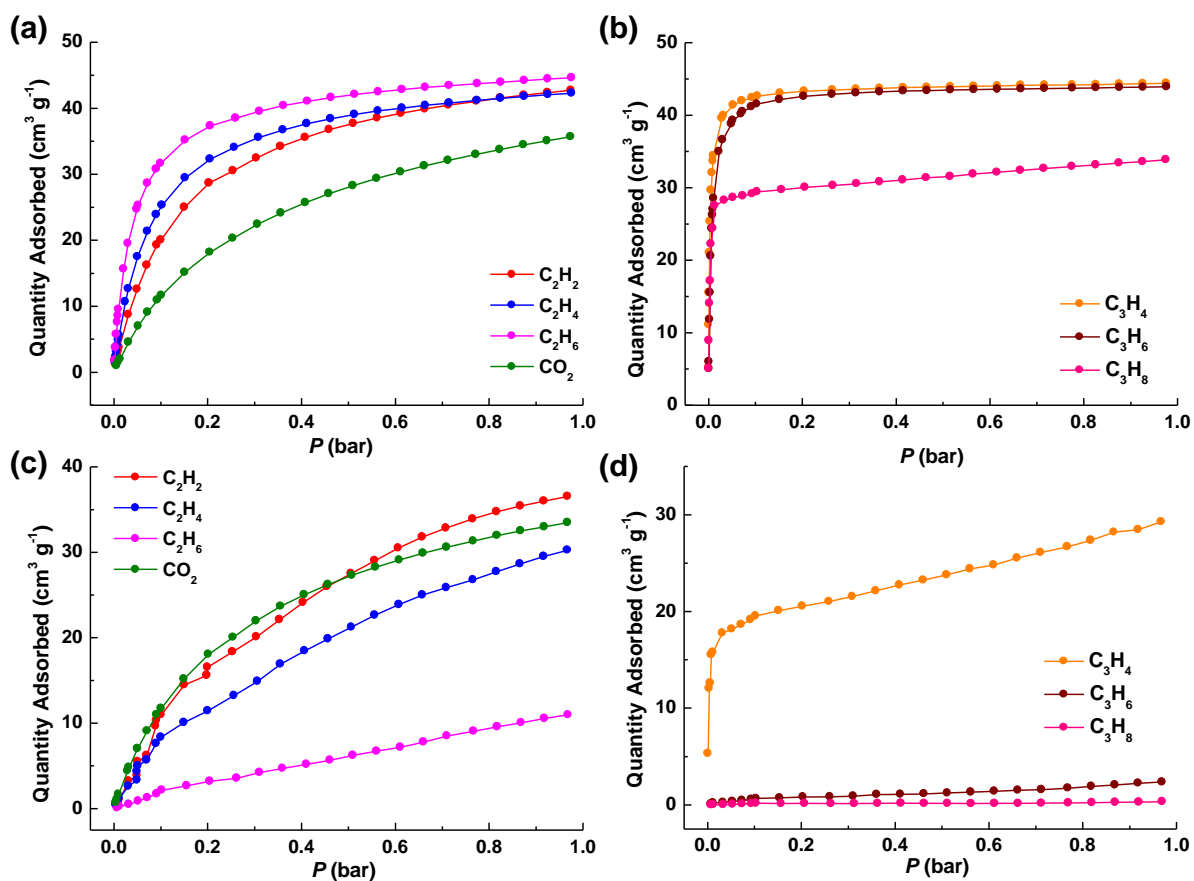

Fig. S5 Single-component gas adsorption isotherms ( $\text{CO}_2$ ,  $\text{C}_2\text{H}_2$ ,  $\text{C}_2\text{H}_4$ ,  $\text{C}_2\text{H}_6$ ,  $\text{C}_3\text{H}_4$ ,  $\text{C}_3\text{H}_6$ , and  $\text{C}_3\text{H}_8$ ) of (a, b) **BUT-305** and (c, d) **BUT-306** recorded at 298 K.

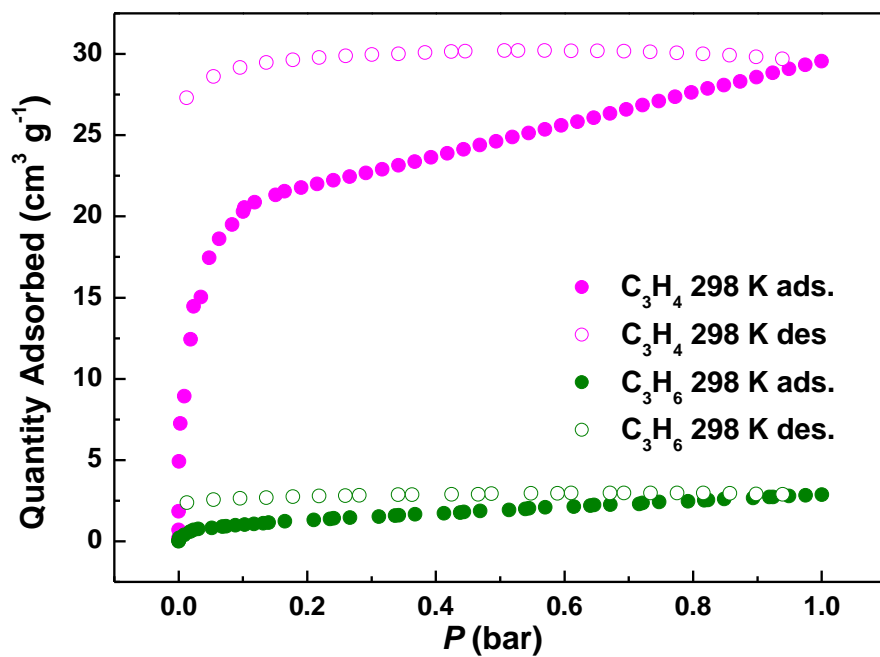

Fig. S6  $\text{C}_3\text{H}_4$ ,  $\text{C}_3\text{H}_6$  adsorption and desorption isotherms of **BUT-306** measured at 298 K.

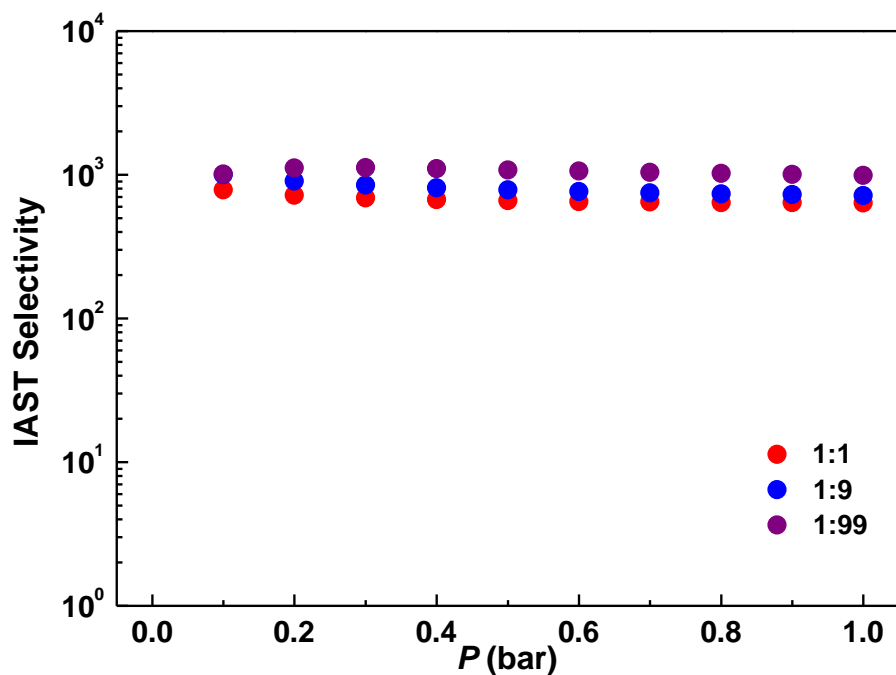

Fig. S7 IAST selectivities of **BUT-306** for 1:1, 1:9 and 1:99 (v/v)  $C_3H_4/C_3H_6$  gas mixtures at 298 K calculated from single-component gas adsorption isotherms.

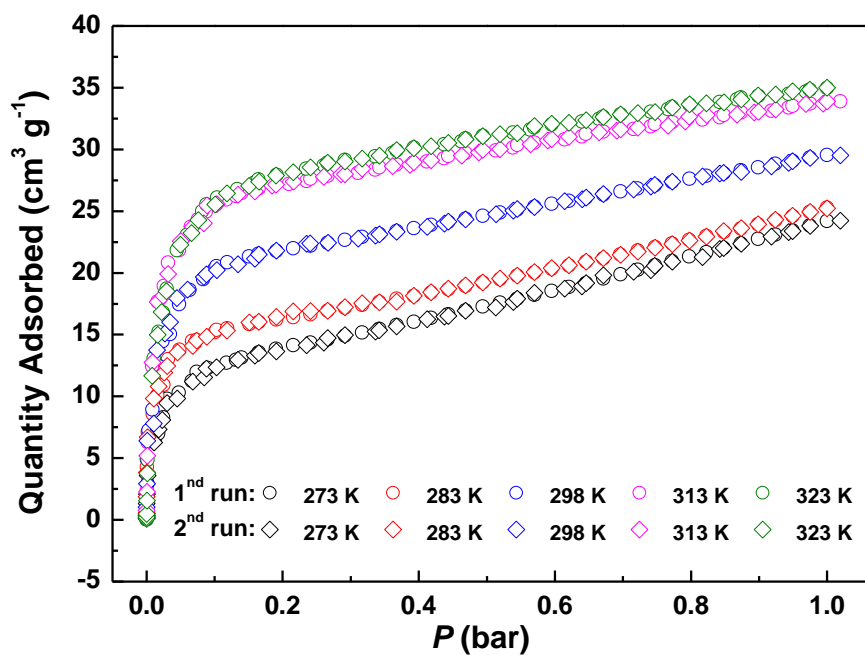

Fig. S8 The  $C_3H_4$  adsorption isotherms of **BUT-306** recorded at 273, 283, 298, 313, and 323 K, respectively. The measurements were repeated to verify the data.

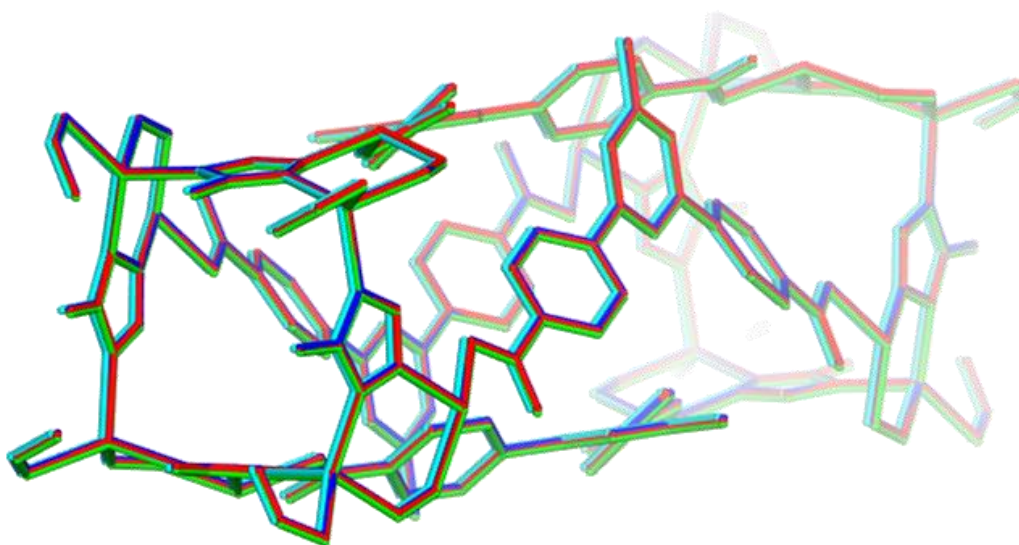

Fig. S9 Overlapping of the framework structures **BUT-306** recorded at 273 K (blue), 298 K (red), and 313 K (green) and that of C<sub>3</sub>H<sub>4</sub>-loaded **BUT-306** recorded at 200 K (turquoise).

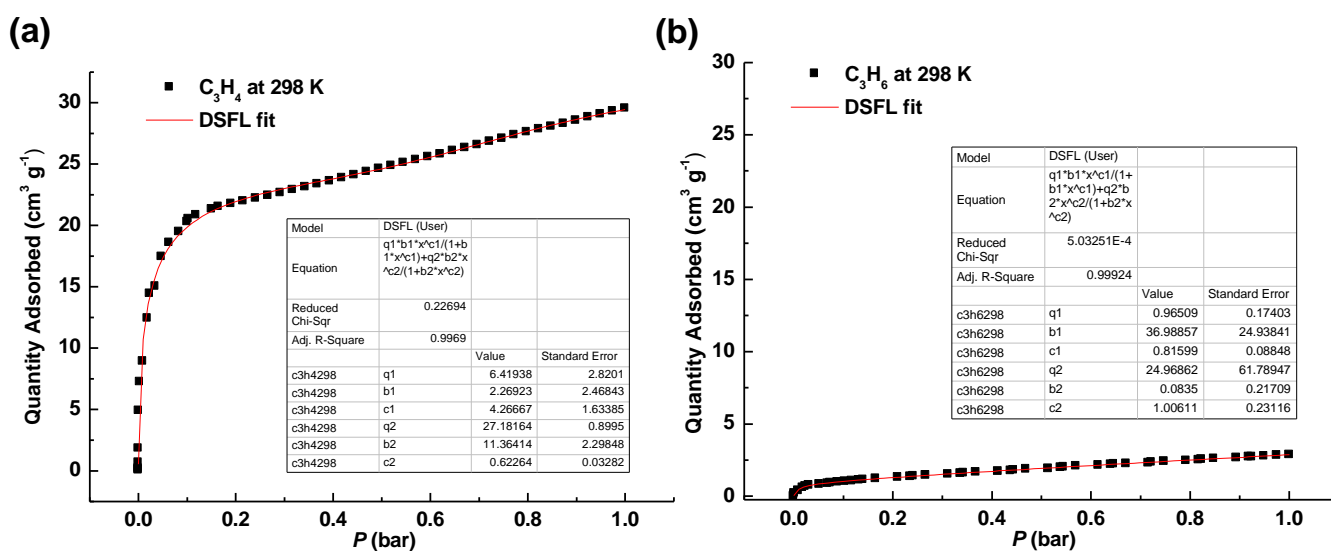

Fig. S10 C<sub>3</sub>H<sub>4</sub> and C<sub>3</sub>H<sub>6</sub> adsorption isotherms of **BUT-306** measured at 298 K and its double-site Langmuir-Freundlich fits.

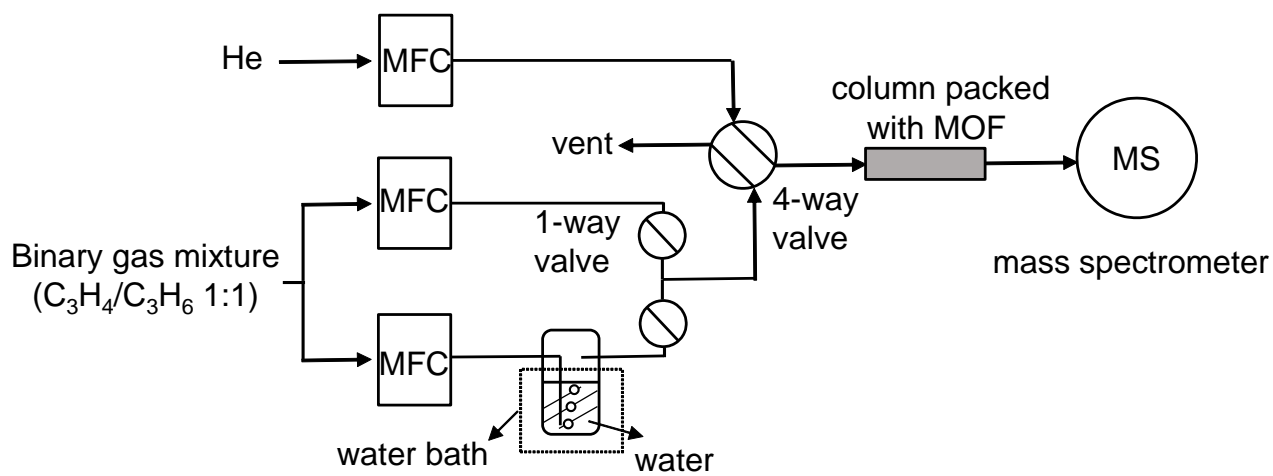

Fig. S11 Schematic diagram of column breakthrough experiment device.

Table S1 Crystal data and structure refinement parameters for **BUT-306** at 273, 298 and 313 K, and C<sub>3</sub>H<sub>4</sub>-loaded **BUT-306** at 200 K.

|                                                                 | <b>BUT-306</b>                                                     | <b>BUT-306</b>                                                     | <b>BUT-306</b>                                                     | C <sub>3</sub> H <sub>4</sub> -loaded <b>BUT-306</b>                  |
|-----------------------------------------------------------------|--------------------------------------------------------------------|--------------------------------------------------------------------|--------------------------------------------------------------------|-----------------------------------------------------------------------|
| Temp. (K)                                                       | 273                                                                | 298                                                                | 313                                                                | 200                                                                   |
| Formula                                                         | C <sub>12.5</sub> H <sub>10</sub> N <sub>4</sub> O <sub>2</sub> Zn | C <sub>12.5</sub> H <sub>10</sub> N <sub>4</sub> O <sub>2</sub> Zn | C <sub>12.5</sub> H <sub>10</sub> N <sub>4</sub> O <sub>2</sub> Zn | C <sub>12.73</sub> H <sub>10.2</sub> N <sub>4</sub> O <sub>2</sub> Zn |
| Crystal system                                                  | tetragonal                                                         | tetragonal                                                         | tetragonal                                                         | tetragonal                                                            |
| Space group                                                     | <i>I4/m</i>                                                        | <i>I4/m</i>                                                        | <i>I4/m</i>                                                        | <i>I4/m</i>                                                           |
| <i>a</i> (Å)                                                    | 12.3290(2)                                                         | 12.3420(2)                                                         | 12.3425(2)                                                         | 12.3020(10)                                                           |
| <i>c</i> (Å)                                                    | 40.6790(6)                                                         | 40.6826(9)                                                         | 40.6799(5)                                                         | 40.7025(5)                                                            |
| <i>α</i> (°)                                                    | 90                                                                 | 90                                                                 | 90                                                                 | 90                                                                    |
| <i>V</i> (Å <sup>3</sup> )                                      | 6183.4(2)                                                          | 6197.0(2)                                                          | 6197.1(2)                                                          | 6159.9(13)                                                            |
| <i>Z</i>                                                        | 16                                                                 | 16                                                                 | 16                                                                 | 16                                                                    |
| <i>D<sub>c</sub></i> (g cm <sup>-3</sup> )                      | 1.348                                                              | 1.345                                                              | 1.345                                                              | 1.365                                                                 |
| <i>F</i> (000)                                                  | 2544.0                                                             | 2544.0                                                             | 2544.0                                                             | 2569.0                                                                |
| Reflections collected                                           | 11595                                                              | 11499                                                              | 11532                                                              | 11249                                                                 |
| Unique reflections                                              | 2364                                                               | 2343                                                               | 2326                                                               | 3109                                                                  |
| GOF                                                             | 1.031                                                              | 1.031                                                              | 1.020                                                              | 1.060                                                                 |
| <i>R</i> <sub>1</sub> <sup>a</sup> [ <i>I</i> > 2σ( <i>I</i> )] | 0.0424                                                             | 0.0588                                                             | 0.0425                                                             | 0.0371                                                                |
| w <i>R</i> <sub>2</sub> <sup>b</sup> (all data)                 | 0.1243                                                             | 0.1192                                                             | 0.1263                                                             | 0.1048                                                                |
| CCDC deposition number                                          | 2168051                                                            | 2168052                                                            | 2168053                                                            | 2168054                                                               |

<sup>a</sup> $R_1 = \sum ||F_o| - |F_c|| / \sum |F_o|$ . <sup>b</sup> $wR_2 = |\sum w(|F_o|^2 - |F_c|^2)| / \sum |w(F_o)^2|^{1/2}$ , where  $w = 1/[\sigma^2(F_o^2) + (aP)^2 + bP]$ .  $P = (F_o^2 + 2F_c^2)/3$



Table S2 Pawley refinement parameters for the PXRD pattern of **BUT-305**.

|                            |                                           |
|----------------------------|-------------------------------------------|
| Formula                    | Zn <sub>2</sub> (ATZ) <sub>2</sub> (TPDC) |
| crystal system             | tetragonal                                |
| space group                | <i>I4/m</i>                               |
| <i>a</i> / Å               | 12.38096(0.00647)                         |
| <i>c</i> / Å               | 40.65355(0.02070)                         |
| <i>R</i> <sub>wp</sub> / % | 8.62                                      |
| <i>R</i> <sub>p</sub> / %  | 6.05                                      |
| <i>U</i>                   | 0.34090(0.18549)                          |
| <i>V</i>                   | -0.14615(0.07521)                         |
| <i>W</i>                   | 0.02189(0.01621)                          |
| <i>NA</i>                  | 0.28626(0.01743)                          |
| <i>NB</i>                  | 0.01061(0.00102)                          |
| Zero Point / °             | 0.37865(0.00167)                          |
| Shift #1                   | -0.48957(0.00097)                         |
| Shift #2                   | 0.10628(0.03413)                          |
| <i>P1</i>                  | -0.20988(0.00230)                         |
| <i>P2</i>                  | -0.11320(0.00109)                         |
| <i>P3</i>                  | 0.21332(0.00475)                          |
| <i>P4</i>                  | 0.18014(0.00218)                          |

Table S3 Comparison of C<sub>3</sub>H<sub>4</sub> and C<sub>3</sub>H<sub>6</sub> uptake (mmol/g, mmol/cm<sup>3</sup> and cm<sup>3</sup>/cm<sup>3</sup>) from gas adsorption isotherms at various pressures, and the C<sub>3</sub>H<sub>4</sub>/C<sub>3</sub>H<sub>6</sub> uptake ratio at 0.01/0.01 bar and 0.01/0.99 bar for various reported MOFs at 298 K.

| MOFs          | C <sub>3</sub> H <sub>4</sub> adsorption |         |          | C <sub>3</sub> H <sub>6</sub> adsorption |         |          | C <sub>3</sub> H <sub>4</sub> /C <sub>3</sub> H <sub>6</sub> |           | Ref.                     |
|---------------|------------------------------------------|---------|----------|------------------------------------------|---------|----------|--------------------------------------------------------------|-----------|--------------------------|
|               | mmol g <sup>-1</sup>                     |         |          | mmol g <sup>-1</sup>                     |         |          | adsorption ratio                                             |           |                          |
|               | 0.01 bar                                 | 0.1 bar | 0.99 bar | 0.01 bar                                 | 0.1 bar | 0.99 bar | 0.99/0.99                                                    | 0.01/0.99 |                          |
| UTSA-200      | 2.99                                     | 3.3     | 3.58     | 0.02                                     | 0.33    | 1.2      | 2.98                                                         | 2.49      |                          |
| SIFSIX-3-Ni   | 2.56                                     | 2.73    | 2.85     | 0.15                                     | 2.42    | 2.72     | 1.05                                                         | 0.98      |                          |
| ZU-62         | 2.19                                     | 3.01    | 3.64     | 0.17                                     | 2.26    | 2.67     | 1.36                                                         | 0.82      |                          |
| SIFSIX-2-Cu-i | 1.96                                     | 3.22    | 3.77     | 0.15                                     | 2.19    | 2.63     | 1.43                                                         | 0.74      |                          |
| SIFSIX-1-Cu   | 2.57                                     | 6.79    | 8.63     | 0.3                                      | 4.92    | 5.88     | 1.47                                                         | 0.44      |                          |
| ELM-12        | 1.82                                     | 2.54    | 2.77     | 0.19                                     | 1.11    | 1.43     | 1.94                                                         | 1.27      |                          |
| ZJUT-1        | 0.4                                      | 1.07    | 2.24     | 0.06                                     | 0.54    | 0.84     | 2.67                                                         | 0.47      | Ref. [32] in<br>maintext |
| Mg-MOF-74     | 2.71                                     | 7.32    | 9.4      | 2.03                                     | 6.07    | 6.49     | 1.33                                                         | 0.42      |                          |
| Co-MOF-74     | 2.85                                     | 5.8     | 7.47     | 1.27                                     | 5.64    | 5.95     | 1.26                                                         | 0.48      |                          |
| Ni-MOF-74     | 1.8                                      | 4.68    | 5.51     | 1.53                                     | 4.5     | 4.78     | 1.15                                                         | 0.38      |                          |
| Fe-MOF-74     | 2.18                                     | 6.67    | 7.94     | 1.67                                     | 6.25    | 6.63     | 1.20                                                         | 0.33      |                          |
| Cu-BTC        | 1.47                                     | 8.17    | 10.47    | 1.36                                     | 7.9     | 8.33     | 1.26                                                         | 0.18      |                          |
| Fe-BTT        | 1.74                                     | 6.87    | 12.41    | 1.52                                     | 8.03    | 8.74     | 1.42                                                         | 0.2       |                          |

|                |             |             |             |             |             |             |              |             |                          |
|----------------|-------------|-------------|-------------|-------------|-------------|-------------|--------------|-------------|--------------------------|
| Cr-BTT         | 1.08        | 4.42        | 7.28        | 0.76        | 5.04        | 5.85        | 1.24         | 0.18        |                          |
| MIL-100(Cr)    | 1.52        | 4.98        | 14.51       | 0.63        | 4.53        | 6.25        | 2.32         | 0.24        |                          |
| MIL-100(Fe)    | 1.34        | 4.74        | 17.14       | 0.52        | 4.52        | 6.96        | 2.46         | 0.19        |                          |
| UIO-66         | 1.58        | 5.29        | 10.23       | 0.36        | 2.7         | 3.33        | 3.07         | 0.47        |                          |
| ZIF-8          | 0.13        | 1.44        | 6.27        | 0.08        | 3.15        | 4.07        | 1.54         | 0.03        |                          |
| UTSA-74-Zn     | 0.33        | 2.13        | 7.43        | 0.09        | 2.47        | 5.07        | 1.45         | 0.06        |                          |
| UTSA-100       | 1.87        | 4           | 5.35        | 1.34        | 2.68        | 3.04        | 1.76         | 0.62        |                          |
| Co-gallate     | 1.61        | 2.4         | 3.21        | 0.09        | 0.5         | 1.49        | 2.15         | 1.08        |                          |
| Mg-gallate     | 1.65        | 2.7         | 3.75        | 0.08        | 1.0         | 1.50        | 2.50         | 1.10        | Ref. [51] in<br>maintext |
| Ni-gallate     | 1.1         | 1.9         | 2.65        | 0.18        | 0.4         | 0.9         | 2.94         | 1.22        |                          |
| NKMOF-1        | 1.78        | 2.10        | 2.90        | 0.65        | 0.75        | 1.50        | 1.93         | 1.19        | Ref. [52] in<br>maintext |
| <b>BUT-306</b> | <b>0.44</b> | <b>0.89</b> | <b>1.29</b> | <b>0.02</b> | <b>0.04</b> | <b>0.12</b> | <b>10.75</b> | <b>3.67</b> | <b>this work</b>         |

---
